# Supplementary material for: CuCo2O4 nanoneedle array with high stability for high performance asymmetric supercapacitors
Source: Royal Society of Chemistry journal article supplement (doi:10.1039/d0ra03771k), 2020-01-01
Supplement: d0ra03771k1.pdf [file d0ra03771k1.pdf]

# **CuCo<sub>2</sub>O<sub>4</sub> nanoneedle array with high stability for high performance asymmetric supercapacitors**

Ling Zhang,<sup>a</sup> Ruizhi Li,<sup>\*ab</sup> Weiqun Li,<sup>a</sup> Rongcong Li,<sup>a</sup> Chenliang Li<sup>a</sup> and Yingke  
Zhou<sup>\*a</sup>

<sup>a</sup>The State Key Laboratory of Refractories and Metallurgy, Institute of Advanced Materials and  
Nanotechnology, College of Materials and Metallurgy, Wuhan University of Science and  
Technology, Wuhan 430081, P. R. China.

<sup>b</sup>Chongqing Key Laboratory for Advanced Materials & Technologies of Clean Energies,  
Chongqing 400715, P. R. China.

---

\* Corresponding author. Tel.: +86 2768 862928, Fax: +86 2768 862928. E-mail: [rzli@wust.edu.cn](mailto:rzli@wust.edu.cn),  
[zhouyk@wust.edu.cn](mailto:zhouyk@wust.edu.cn).

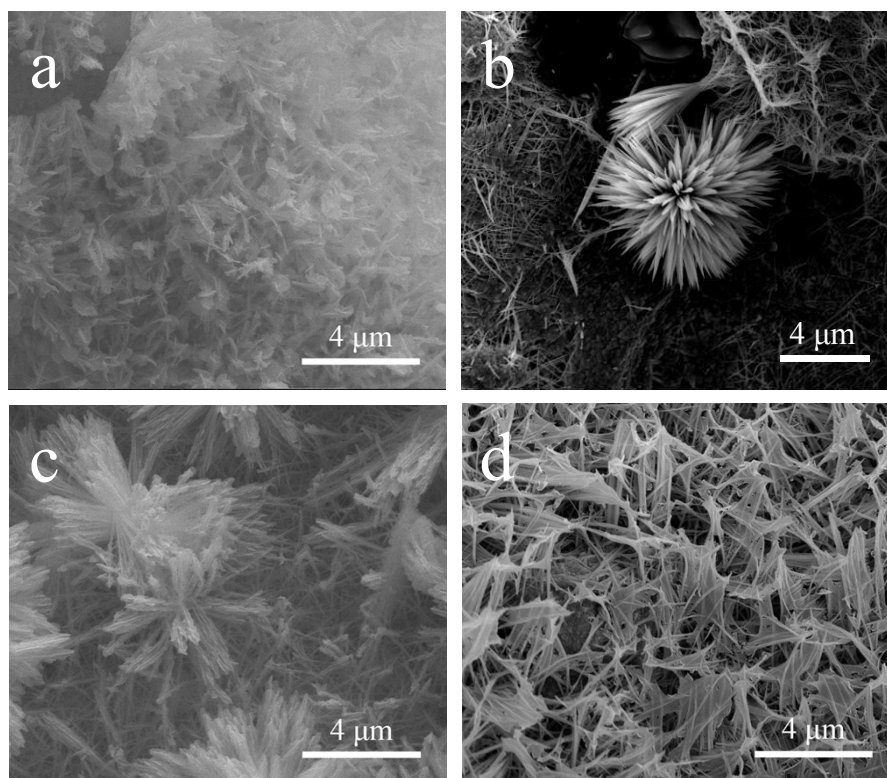

**Fig. S1.** SEM images of (a)  $\text{CuCo}_2\text{O}_{4-3}$ , (b)  $\text{CuCo}_2\text{O}_{4-6}$ , (c)  $\text{CuCo}_2\text{O}_{4-9}$ , (d)  $\text{CuCo}_2\text{O}_{4-15}$ .

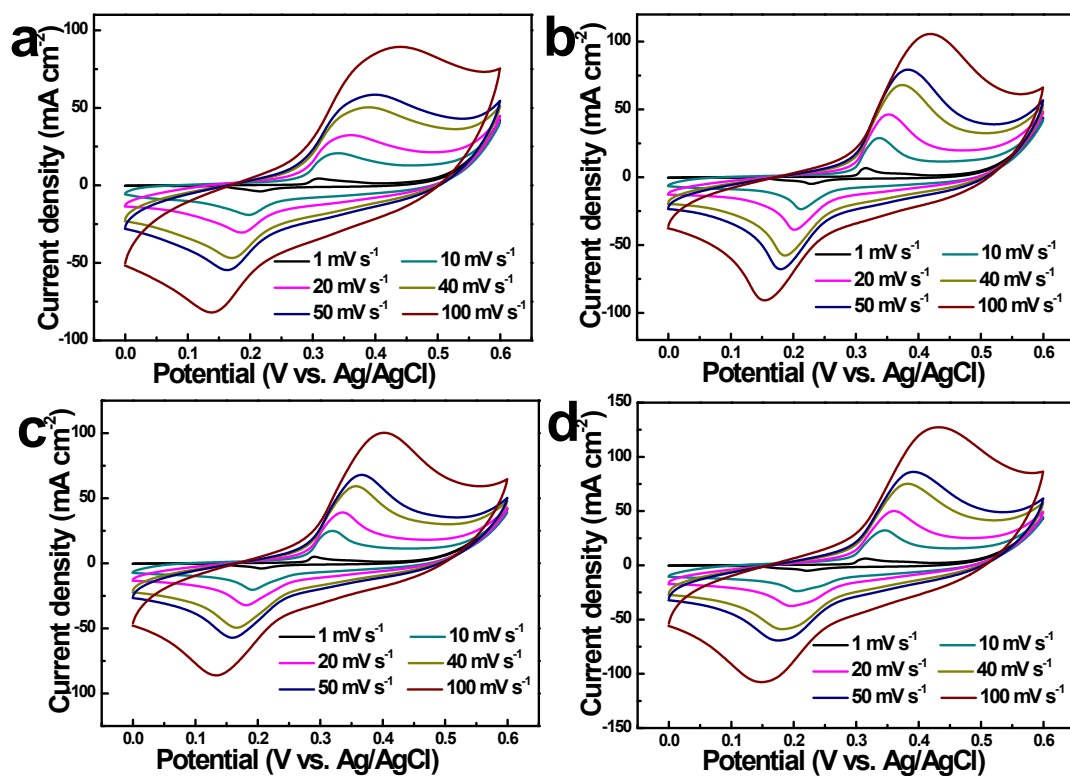

Fig. S2. CV curves of (a) CuCo<sub>2</sub>O<sub>4</sub>-3, (b) CuCo<sub>2</sub>O<sub>4</sub>-6, (b) CuCo<sub>2</sub>O<sub>4</sub>-9, (c) CuCo<sub>2</sub>O<sub>4</sub>-15 electrodes at various scan rates.
